# Supplementary material for: Multifunctional degradable electronic scaffolds for cardiac tissue engineering
Source: PubMed Central journal article supplement — J Control Release. 2018 Jul 10;281:189–95. doi: 10.1016/j.jconrel.2018.05.023 (PMC6018619; doi:10.1016/j.jconrel.2018.05.023), 2018-07-10
Supplement: mmc2.pdf [file mmc2.pdf]

## Supplementary Information

### Multifunctional degradable electronic scaffolds for cardiac tissue engineering

Ron Feiner<sup>1,2\*</sup>, Sharon Fleischer<sup>1,2,\*</sup>, Assaf Shapira<sup>1,2</sup>, Or Kalish<sup>1</sup> and Tal Dvir<sup>#, 1,2,3,4</sup>

<sup>1</sup>The School for Molecular Cell Biology and Biotechnology, Faculty of Life Sciences, Tel Aviv University, Tel Aviv 69978, Israel.

<sup>2</sup>The Center for Nanoscience and Nanotechnology, Tel Aviv University, Tel Aviv 69978, Israel

<sup>3</sup>Department of Materials Science and Engineering, Faculty of Engineering, Tel Aviv University, Tel Aviv 69978, Israel.

<sup>4</sup>Sagol Center for Regenerative Biotechnology, Tel Aviv University, Tel Aviv 69978, Israel

\*These authors contributed equally to this work

#Correspondence to Tal Dvir (tdvir@post.tau.ac.il)

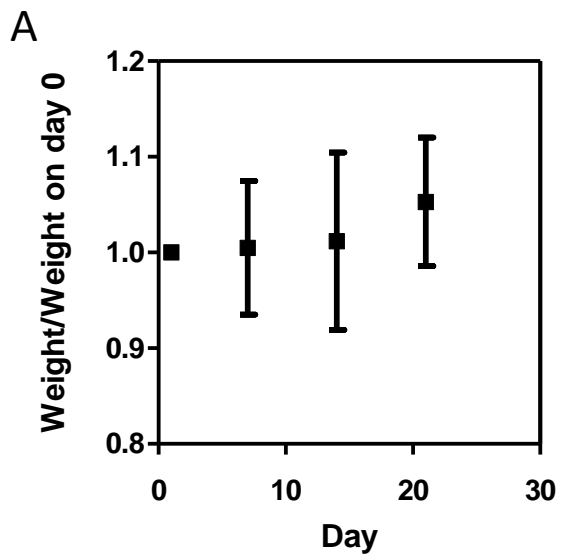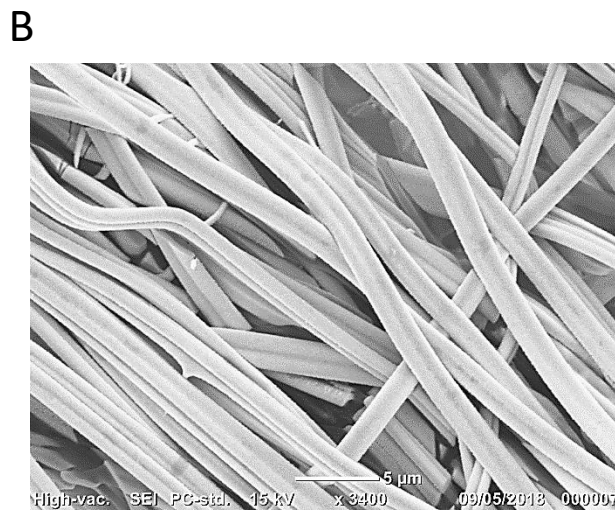

**Figure S1. In vitro degradation of the gold coated devices.** A. Device weight after 21 days in *in-vitro* conditions. B. Scanning electron micrograph of the electrospun fibers in the device after 21 days in *in-vitro* conditions.

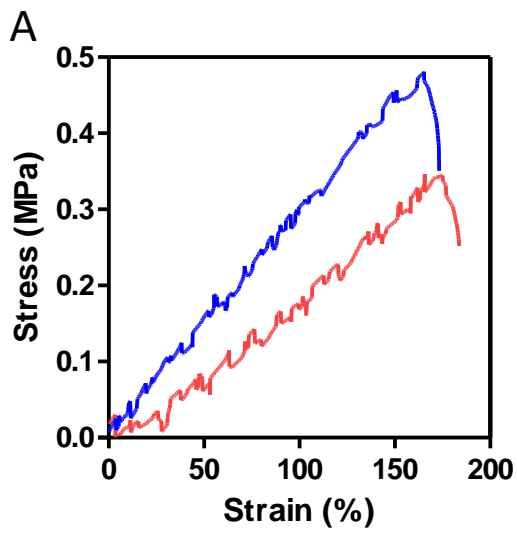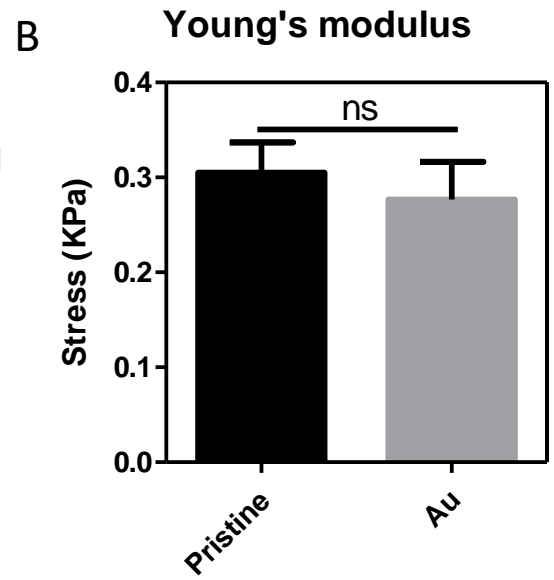

**Figure S2. Mechanical characterization.** A. Stress strain curves for gold coated and pristine devices. B. A comparison of the Young's moduli of the pristine and gold-coated devices

Before

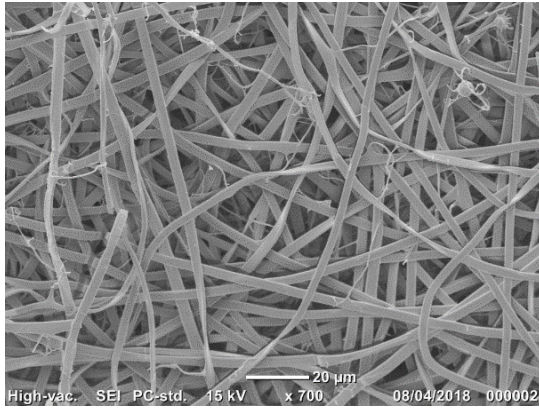

After

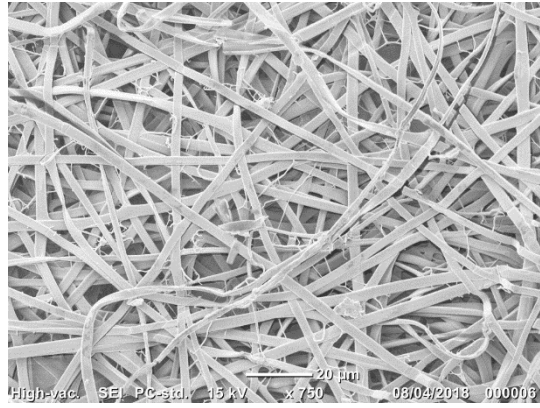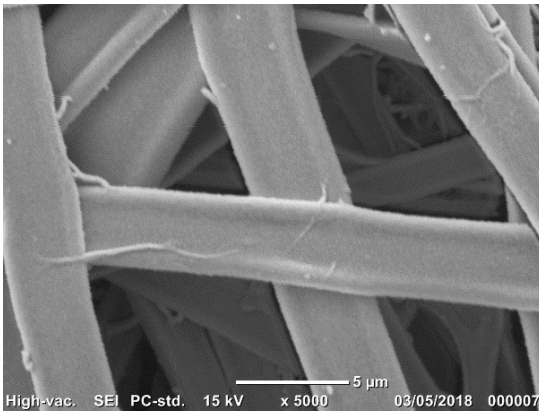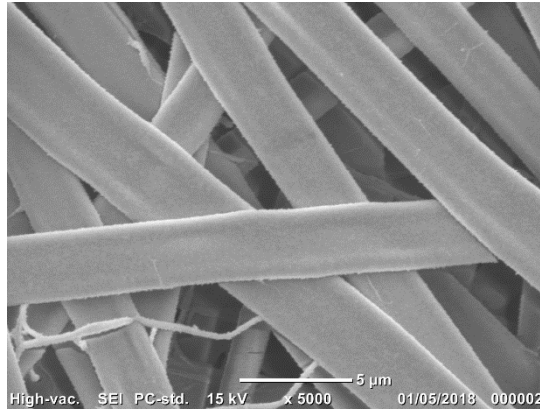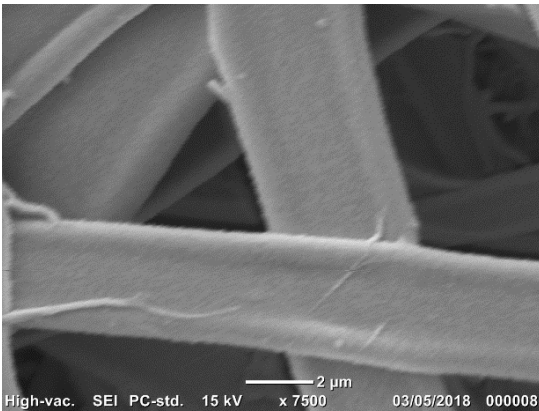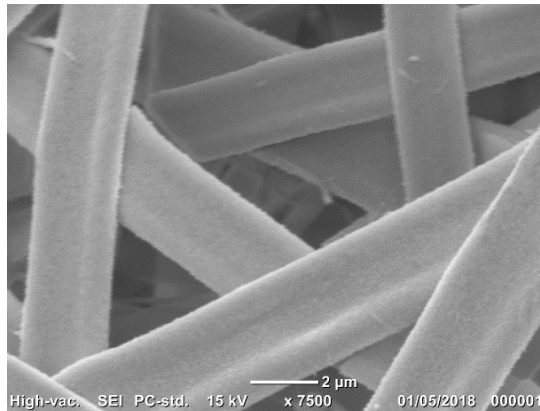

**Figure S3. Albumin fibers before and after mechanical stretching.** Scanning electron micrographs of electrospun albumin fibers before and after applying cyclical strain at 20% for 30 cycles.
